# Supplementary material
Source: HighWire-hosted journal article supplement (https://bmjopen.bmj.com/content/13/6/e065010)
Supplement: inline-supplementary-material-3 [file inline-supplementary-material-3.pdf]

**Supplementary File 3: possible treatment-related toxicity, adapted from the CTCAE v5.0 and the STAR-TREC trial**

| <b>Category</b>            | <b>Toxicity</b>                      |
|----------------------------|--------------------------------------|
| Gastrointestinal disorders | Abdominal pain                       |
|                            | Anal/rectal fistula                  |
|                            | Anal/rectal hemorrhage               |
|                            | Anal mucositis                       |
|                            | Anal/rectal necrosis                 |
|                            | Anal/rectal pain                     |
|                            | Anal/rectal stenosis                 |
|                            | Anal/rectal ulcer                    |
|                            | Colonic/small intestinal fistula     |
|                            | Lower gastrointestinal hemorrhage    |
|                            | Colonic/small intestinal obstruction |
|                            | Colonic/small intestinal perforation |
|                            | Colonic/small intestinal stenosis    |
|                            | Colonic/small intestinal ulcer       |
|                            | Constipation                         |
|                            | Diarrhea                             |
|                            | Enterocolitis                        |
|                            | Enterovesical fistula                |
|                            | Fecal incontinence                   |
|                            | Hemorrhoids                          |
|                            | Hemorrhoidal hemorrhage              |
|                            | Ileus                                |
|                            | Intra-abdominal hemorrhage           |

|                                                |                                              |
|------------------------------------------------|----------------------------------------------|
|                                                | Proctitis                                    |
|                                                | Rectal obstruction                           |
|                                                | Rectal perforation                           |
| Renal and urinary disorders                    | Bladder perforation                          |
|                                                | Bladder spasm                                |
|                                                | Cystitis noninfective                        |
|                                                | Hematuria                                    |
|                                                | Urinary fistula                              |
|                                                | Urinary incontinence                         |
|                                                | Urinary retention                            |
|                                                | Urinary tract obstruction                    |
|                                                | Urinary tract pain                           |
| Injury, poisoning and procedural complications | Dermatitis radiation (if in radiation field) |
| Reproductive system and breast disorders       | Prostatic pain                               |
|                                                | Uterine fistula                              |
|                                                | Uterine hemorrhage                           |
|                                                | Vaginal fistula                              |
|                                                | Vaginal hemorrhage                           |
|                                                | Vaginal perforation                          |
|                                                | Vaginal stricture                            |
| General disorders                              | Fatigue                                      |
|                                                | Malaise                                      |
|                                                | Pain                                         |
| Infections and infestations                    | Abdominal infection                          |
|                                                | Anorectal infection                          |
|                                                | Bladder infection                            |
|                                                | Enterocolitis infectious                     |

|                                                 |                                         |
|-------------------------------------------------|-----------------------------------------|
|                                                 | Prostate infection                      |
|                                                 | Vaginal infection                       |
|                                                 | Uterine infection                       |
|                                                 | Wound infection (if in radiation field) |
| Musculoskeletal and connective tissue disorders | Abdominal soft tissue necrosis          |
|                                                 | Pelvic soft tissue necrosis             |
|                                                 | Osteonecrosis                           |
| Nervous system disorders                        | Neuralgia                               |
|                                                 | Peripheral motor/sensory neuropathy     |
